# Supplementary material for: Construction of novel 1D nickel phosphonate nanorod modified 2D g-C3N4 nanosheets for enhanced photocatalytic hydrogen evolution performance
Source: Royal Society of Chemistry journal article supplement (doi:10.1039/d3se01324c), 2024-01-01
Supplement: d3se01324c1.pdf [file d3se01324c1.pdf]

## Supporting information

### **Construction of novel 1D nickel phosphonate nanorods modified 2D g-C<sub>3</sub>N<sub>4</sub> nanosheets for enhanced photocatalytic hydrogen evolution performance**

Xin-Lian Song, Sixiang Zhai, Jin-Tao Ren, Lijiao Gao, Zhong-Yong Yuan\*

*Key Laboratory of Advanced Energy Materials Chemistry (Ministry of Education),  
School of Materials Science and Engineering, Smart Sensing Interdisciplinary Science  
Center, Nankai University, Tianjin 300350, China*

\* Corresponding author. *E-mail address:* [zyyuan@nankai.edu.cn](mailto:zyyuan@nankai.edu.cn)

## 1. Supplementary figures

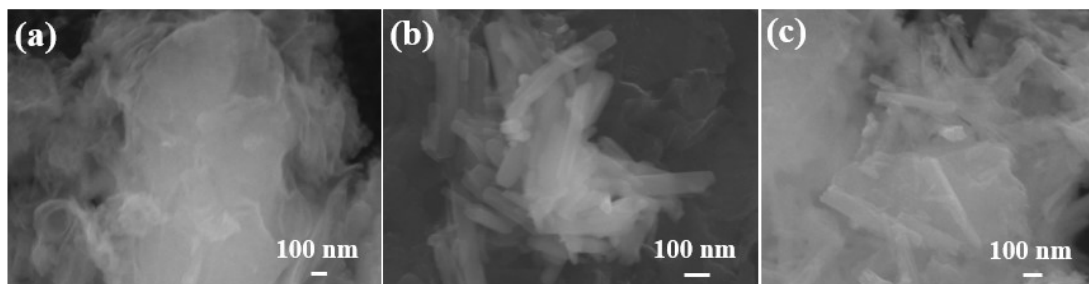

**Figure S1.** SEM images of (a) CN, (b) NiPPh and (c) CN/NiPPh-1.

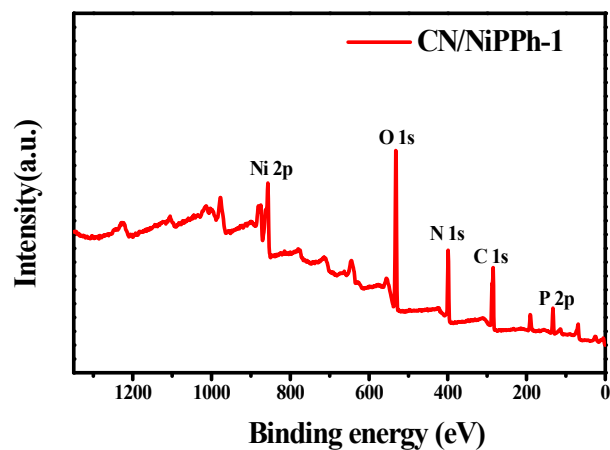

**Figure S2.** XPS survey spectra for CN/NiPPh-1.

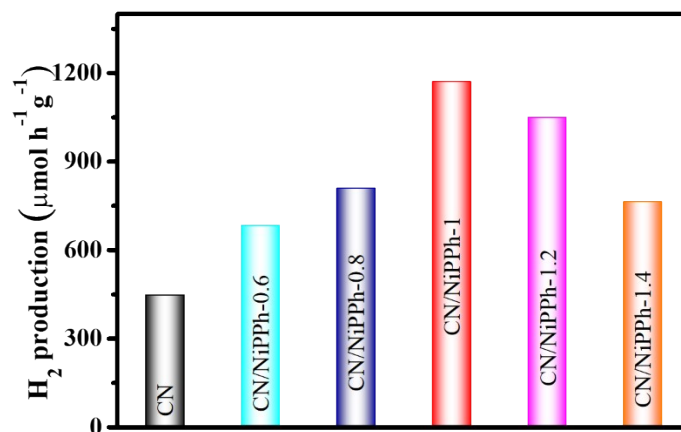

**Figure S3.** H<sub>2</sub> production rate of CN and CN/NiPPh-x with Pt co-catalyst.

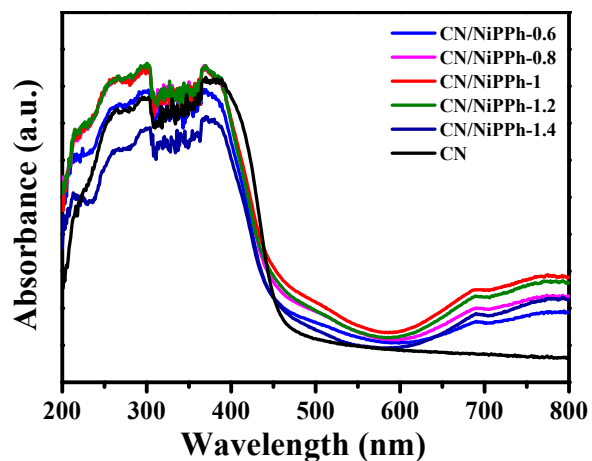

**Figure S4.** UV-vis diffuse reflectance spectra of CN and CN/NiPPh-*x* composites.

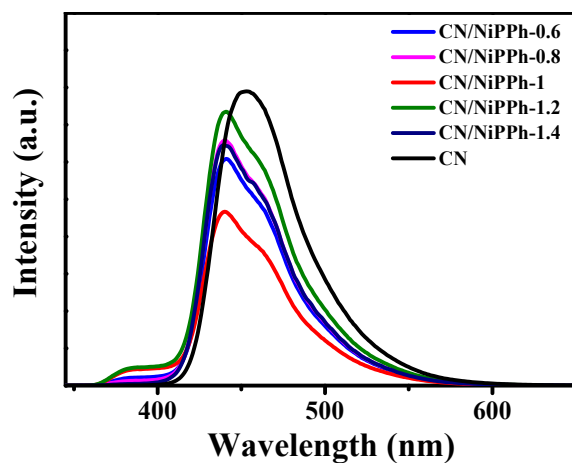

**Figure S5.** PL spectra of CN and CN/NiPPh -*x* composites.

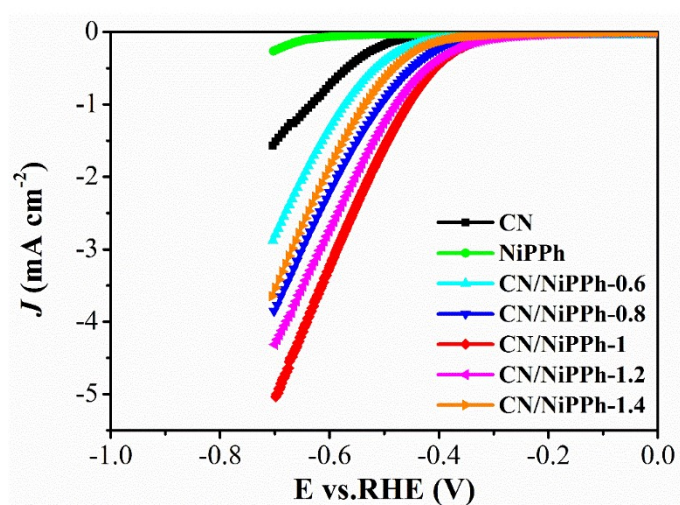

**Figure S6.** Polarization curves of CN, NiPPh, and CN/NiPPh-*x* composites.
